# Supplementary material for: Identification and expression analysis of the sucrose synthase gene family in pomegranate (Punica granatum L.)
Source: PeerJ. 2022 Jan 10;10:e12814. doi: 10.7717/peerj.12814 (PMC8757371; doi:10.7717/peerj.12814)
Supplement: Supplemental Information 2 [file peerj-10-12814-s002.xls]

## Sheet: qPCR primers 
Data S2. QRT-PCR primers of SUS genes in pomegranate.
Gene	Accession No.	Forward primer sequence (5’–3’)	Reverse primer sequence (5’–3’)	Size (bp)
PgActin	GU376750	GATTCTGGTGATGGTGTGAG	GACAATTTCCCGTTCAGCAG	168
PgSUS1	XM_031527544.1	TGAATCGGGTGAGGAACG	ATGTAGGCAGCCCGCAAG	129
PgSUS2	XM_031535599.1	CCTGAAACGCATAAACGA	TGCTTGGCTAACTTCTGATC	117
PgSUS3	XM_031544401.1	GTCAGCCCAAACAAATCG	TATCTCCGCAGGACCACC	174
PgSUS4	XM_031516902.1	CTCGTCCCAGATGAACCG	GTCAGCCCAAACGCCTC	105
PgSUS5	XM_031551757.1	CAACGGATTTACGAGTGCTA	CATTCTTTGCCAAGTTTCTG	166
