# Supplementary material for: Identification and expression analysis of the sucrose synthase gene family in pomegranate (Punica granatum L.)
Source: PeerJ. 2022 Jan 10;10:e12814. doi: 10.7717/peerj.12814 (PMC8757371; doi:10.7717/peerj.12814)
Supplement: Supplemental Information 4 [file peerj-10-12814-s004.xlsx]

## Sheet: Sheet1
Data S4. Identity/similarity matrix of the 68 SUS nucleotide/amino acid sequences
	AtSUS1	AtSUS2	AtSUS3	AtSUS4	AtSUS5	AtSUS6	GmSUS1	GmSUS2	GmSUS3	GmSUS4	GmSUS5	GmSUS6	GmSUS7	GmSUS8	GmSUS9	GmSUS10	GmSUS11	GmSUS12	MdSUS1.1	MdSUS1.2	MdSUS1.3	MdSUS1.4	MdSUS2.1	MdSUS2.2	MdSUS2.3	MdSUS3.1	MdSUS3.2	MdSUS3.3	MdSUS3.4	OsSUS1	OsSUS2	OsSUS3	OsSUS4	OsSUS5	OsSUS6	PbrSUS1	PbrSUS2	PbrSUS3	PbrSUS4	PbrSUS5	PbrSUS6	PbrSUS7	PbrSUS8	PbrSUS9	PbrSUS10	PbrSUS11	PbrSUS12	PbrSUS13	PbrSUS14
AtSUS1	-	66.33	67.78	84.3	58.37	59.48	58.18	67.24	75.96	58.98	58.52	75.19	58.18	76.37	64.29	59.06	75.01	67.04	73.61	73.76	74.02	74.72	65.88	68.59	66.92	58.23	58.69	59.28	57.39	69.92	70.78	70.13	64.93	59.28	58.82	59.35	73.33	74.18	58.95	58.95	57.64	57.89	66.62	62.52	62.09	62.09	59.32	57.65	58.95
AtSUS2	88.99	-	70.34	66	57.25	58.94	58.8	73.51	67.33	58.47	57.9	67	59.13	68.37	73.93	58.93	66.38	73.35	66.38	66.29	66.25	66.42	71.33	76.78	76.5	58.98	58.57	59.3	57	66	68.2	66.25	69.77	59.57	59.3	59.93	65.52	66.5	58.61	58.61	57.77	58.11	76.42	66.73	66.25	66.25	59.9	58.65	58.61
AtSUS3	67.87	68.61	-	67.24	59.86	59.57	60.18	73.83	66.67	58.74	60.07	66.25	60.18	66.42	69.57	59.11	66.29	74.65	65.84	65.92	66.13	66.5	74.49	71.07	71.17	58.66	58.63	59.95	58.02	65.76	66.79	65.68	70.26	59.71	58.6	60.03	65.49	66.25	59.01	59.01	58.86	58.63	71.51	69.49	69.16	69.16	59.92	59.54	59.01
AtSUS4	66.87	68	74.69	-	58.08	58.78	57.69	67.2	75.96	58.48	57.16	75.1	57.73	76.33	64.88	58.65	74.89	67.12	72.58	72.8	73.07	73.56	65.97	67.91	66.67	57.64	57.77	58.05	56.39	69.92	69.82	70.5	65.09	58.95	58.07	58.66	72.28	73.32	57.73	57.73	56.7	56.8	66.83	63.12	62.69	62.69	58.76	57.19	57.73
AtSUS5	53.45	52.45	55.37	52.5	-	65.92	68.51	58.26	57.37	66.06	68.38	56.86	68.55	58.04	58.47	66.69	56.2	57.93	56.75	56.6	56.76	56.8	59.17	62.42	58.07	66.1	70.18	69.27	68.48	55.28	57.03	55.16	57.49	64.13	62.19	66.78	55.78	56.84	70.39	70.79	69.7	69.61	58.7	58.62	58.25	58.25	66.67	66.62	70.39
AtSUS6	54.7	54.33	56	54.4	65.14	-	68.41	59.43	58.68	67.55	68.05	58.17	68.41	59.01	59.09	67.63	57.67	59.47	58.35	58.33	58.24	58.69	58.98	63.17	59.28	68.82	68.54	67.98	68.43	57.12	58.62	57	59.24	64.61	63.83	68.45	57.13	58.65	66.24	66.81	65.62	67.92	59.41	57.31	57.01	57.01	68.42	68.34	66.24
GmSUS1	54.84	54.71	57.3	54.71	70.45	70.19	-	59.96	57.84	70.36	83.95	57.42	97.07	57.96	58.59	70.44	56.79	59.88	58.22	58.16	58.15	58.19	59.71	63.79	59.73	69.58	77.29	76.57	76.48	56.89	58.94	56.69	59.32	66.57	67.05	69.96	57.03	58.44	77.53	78.1	77.34	77.45	59.77	58.38	58.07	58.07	70.02	70.15	77.53
GmSUS2	68.28	70.01	81.95	76.83	53.87	55.17	55.61	-	68.07	59.92	60.3	67.7	60.33	68.73	73.56	60	67.49	97.33	67	67.04	67	67.86	78.52	76.41	75.61	59.57	60.5	60.96	59.47	65.93	67.45	66.42	73.21	58.88	58.75	60.45	66.54	67.37	60.79	60.79	60.25	60	76.15	73.61	73.17	73.17	60.42	59.89	60.79
GmSUS3	81.64	82.26	68.49	67.5	51.44	54.2	53.66	70.22	-	59.49	57.77	84.78	57.47	96.12	66.79	59.53	84.3	67.66	77.21	77.36	77.32	77.9	66.05	68.91	67.75	58.29	57.93	59.04	57.3	71.11	72.28	71.76	65.88	58.32	58.65	59.45	76.41	77.9	57.93	57.93	57.84	58.14	67.88	62.59	62.17	62.17	59.52	58.27	57.93
GmSUS4	54.4	53.78	56.19	52.98	65.07	64.3	70.78	54.99	52.9	-	69.66	59.4	70.95	59.29	59.96	96.85	58.31	59.63	59.13	59.03	58.93	59.14	59.06	63.54	59.58	72	70.49	68.55	69.57	57.91	59.97	58.68	58.86	65.77	65.52	72.28	57.88	59.35	67.97	69.17	67.26	69.1	60.16	56.77	56.42	56.42	72.17	72.2	67.97
GmSUS5	53.85	53.23	55.57	52.73	69.74	67.82	82.02	54.13	51.92	68.89	-	57.8	83.51	57.44	59.05	69.51	56.73	60.01	57.82	57.63	57.83	58.16	60.09	64.04	59.66	69.65	75.56	75.89	75.33	55.47	57.5	56.08	58.95	64.95	64.66	69.86	56.88	58.03	75.6	76.1	76.21	76.31	59.62	58.2	57.95	57.95	69.91	69.56	75.6
GmSUS6	83.98	85.09	70.06	68.83	52.51	55.28	54.85	71.18	88.94	54.48	53.48	-	57.29	85.61	65.55	59.2	96.61	67.54	77.44	77.42	77.3	78.21	66.79	69.34	68.09	58.88	57.91	58.51	57.19	73.16	72.24	72.83	66	58.64	59.6	59.45	76.59	77.54	58.04	58.04	57.96	57.96	67.8	62.69	62.26	62.26	59.56	58.16	58.04
GmSUS7	54.71	54.47	56.81	54.71	70.7	70.31	97.5	55.73	53.53	71.02	82.14	55.1	-	57.8	59.09	71.07	56.55	60.25	58.05	57.99	57.94	57.82	59.34	64.1	60.15	70.23	77.21	76.16	76.1	56.11	58.65	55.99	59.27	66.22	66.97	70.59	57.08	58.23	77.25	77.81	76.93	77.05	60.19	57.72	57.42	57.42	70.69	70.82	77.25
GmSUS8	82.51	83.37	68.36	68	51.69	54.47	54.04	70.97	97.77	53.54	52.55	90.19	53.91	-	67.17	59.58	85.42	68.48	77.71	77.99	78.03	78.56	66.38	68.97	68.47	58.38	57.76	58.62	57.03	72.2	72.98	72.82	66.79	58.9	59.19	59.63	77.22	78.48	57.97	57.97	57.8	57.97	68.51	63.42	62.98	62.98	59.7	58.54	57.97
GmSUS9	64.96	66.71	73.32	76.93	52.57	54.99	54.06	75.56	67.21	53.43	53.81	68.21	54.06	67.21	-	59.96	65.12	73.56	65.46	65.54	65.54	65.62	73.14	78.58	78.99	59.19	58.43	59.28	57.94	63.84	65.25	64.34	70.25	59.4	58.62	60.41	64.92	65.67	58.64	58.64	58.53	58.43	79.57	68.05	67.68	67.68	60.47	59.75	58.64
GmSUS10	54.77	54.03	56.06	53.1	65.87	64.91	71.5	54.87	53.15	96.09	70.07	54.85	71.62	53.79	53.93	-	58.27	59.75	59.09	59.03	58.89	59.02	59.14	63.85	59.87	71.74	70.57	68.64	69.7	57.5	59.97	57.99	58.82	66	65.36	71.89	57.75	59.26	68.04	69.25	67.11	69.02	60.37	56.95	56.59	56.59	71.86	71.76	68.04
GmSUS11	82.88	84	69.23	67.91	51.92	53.85	54.51	69.93	87.78	52.76	53.09	98.01	54.76	88.34	67.71	53.12	-	67.2	76.55	76.58	76.41	77.7	66.46	68.53	67.42	57.7	57.23	57.03	56.48	72.54	71.86	71.92	65.72	57.46	58.88	58.45	75.91	76.79	57.25	57.37	56.88	56.81	67.34	62.35	61.93	61.93	58.46	56.97	57.25
GmSUS12	68.15	69.64	82.2	77.2	54.24	55.05	56.35	97.04	69.6	54.87	54.75	70.81	56.47	70.35	75.81	54.87	69.55	-	67.29	67.33	67.53	68.24	78.47	76.1	75.53	59.78	60.42	60.87	59.3	65.8	67.29	66.38	73.09	58.88	58.66	60.71	67.05	67.82	60.63	60.63	60.08	59.83	75.95	73.25	72.81	72.81	60.68	60.12	60.63
MdSUS1.1	78.76	79.5	67.83	65.71	50.63	54.66	54.6	68.7	80.87	53.23	52.49	83.35	54.48	81.61	65.08	53.48	81.86	68.57	-	98.76	95.95	92.19	65.8	68.72	67.67	58.39	58.52	59.2	57.67	71.71	72.49	71.67	67.21	58.9	59.65	58.9	94.18	96.98	58.52	58.52	58.26	58.57	67.84	62.51	62.08	62.08	58.96	57.77	58.52
MdSUS1.2	75.97	76.59	65.63	63.75	48.74	52.55	52.74	66.13	77.96	51	50.37	80.42	52.49	78.7	63.19	51.25	78.95	66	95.77	-	96.15	92.38	65.84	68.73	67.76	58.37	58.42	59.03	57.52	71.68	72.46	71.72	67.37	58.67	59.51	58.8	94.37	97.27	58.5	58.5	58.11	58.46	67.93	62.49	62.07	62.07	58.86	57.65	58.5
MdSUS1.3	79.03	80.15	68.61	66.5	50.44	54.96	54.66	68.61	80.77	53.42	52.8	83.73	54.53	81.76	65.96	53.66	82.13	68.49	95.53	92.54	-	92.66	65.84	68.1	67.38	58.14	58.07	59.16	57.6	71.91	72.85	71.95	67.33	58.7	59.12	58.87	96.29	96.78	58.15	58.15	58.01	58.2	67.71	62.33	61.91	61.91	58.89	57.6	58.15
MdSUS1.4	81.89	81.89	69.48	67.37	51.69	55.46	55.4	70.22	82.51	54.29	54.29	85.22	55.28	83.5	66.58	54.66	83.87	70.1	91.69	89.05	92.44	-	65.96	68.59	67.76	58.69	58.53	59.35	57.55	72.49	72.56	72.57	67.78	59.53	59.62	59.3	91.11	92.99	58.79	58.79	58.31	58.62	67.96	62.76	62.33	62.33	59.37	58.06	58.79
MdSUS2.1	66.79	69.02	82.2	75.22	54.86	54.8	56.84	81.4	67.87	54.25	54.62	70.43	56.47	68.49	74.44	54.5	69.43	82.02	67.33	64.76	67.74	68.36	-	73.99	74.95	58.02	59.75	60.07	58.4	65.76	66.34	65.39	72.59	58.67	59.12	59.02	65.32	66.34	59.54	59.54	59.31	59.21	75.2	86.55	85.95	85.95	58.91	58.34	59.54
MdSUS2.2	70.84	71.78	76.87	83.58	63.62	66.04	65.67	80.22	71.59	62.31	65.11	71.78	65.67	71.4	82.84	63.25	71.78	79.48	69.72	65.98	69.53	71.78	77.24	-	97.14	63.39	65.24	64.03	64.28	67.04	68.22	67.23	74.24	62.45	62.32	64.14	66.92	68.66	65.5	65.5	64.83	64.66	95.03	68.64	68.09	68.09	64.16	64.04	65.5
MdSUS2.3	67.17	68.81	75.94	81.1	53.96	55.12	55.94	77.88	69.06	53.57	55.32	70.28	56.07	69.31	81.43	53.94	69.51	78	67.38	64.77	67.42	69.18	76.75	96.83	-	59.43	60.38	60.72	59.51	66.37	67.38	66.92	73.59	59.63	58.81	60.27	66.58	67.8	60.64	60.64	60.12	59.96	97.42	69.84	69.33	69.33	60.25	59.55	60.64
MdSUS3.1	54.67	53.79	55.99	53.48	65.65	69.63	69.87	56.03	53.15	69.98	68.52	54.37	71.2	53.67	54.07	70.64	52.69	56.16	54.25	52.1	54.3	54.56	54.52	64.68	54.59	-	72.4	70.9	71.63	56.54	58.44	57.25	58.75	64.97	64.26	94.06	56.96	58.48	70.8	71.85	70.12	71.26	59.81	56.79	56.37	56.37	93.9	94.76	70.8
MdSUS3.2	53.86	53.35	55.36	52.84	71.98	69.49	77.71	54.9	52.77	70.34	74.14	54.12	78.08	53.29	53.05	70.88	53.32	55.15	53.87	51.84	53.42	54.3	55.15	65.07	54.46	71.11	-	90.97	90.4	56.12	59.04	57	59.22	66.8	66.52	72.84	57.15	58.74	97.2	97.3	92.48	92.24	60.34	59.12	58.79	58.79	72.81	72.83	97.2
MdSUS3.3	56.39	56.11	57.59	55.52	71.59	67.73	75.03	57.43	54.38	68.13	72.73	56.05	75.44	55.11	55.97	68.99	55.13	57.57	55.9	53.78	55.68	56.82	56.86	64.49	57.28	69.84	91.23	-	95.14	57.27	59.66	57.74	60.02	66.07	65.59	70.96	57.72	59.63	90	91.6	93.76	95.02	60.72	58.24	57.98	57.98	70.84	70.96	90
MdSUS3.4	52.6	52.08	54.03	51.3	69.97	69.11	75.98	53.82	51.5	68.99	72.82	52.61	76.49	51.89	52.42	69.67	52.21	54.08	52.48	50.52	52.41	53.06	53.56	63.69	53.75	70.72	90.84	93.05	-	55.87	58.1	56.3	58.37	66.41	66.2	71.88	56.1	57.9	90.87	90.87	94.78	93.64	59.47	58.11	57.85	57.85	71.85	72.05	90.87
OsSUS1	71.41	73.76	69.02	68.94	50.31	53.74	54.39	70.37	73.7	52.52	52.41	75.53	54.39	74.44	66.5	53.01	74.11	70.62	71.8	68.99	72.46	73.2	68.64	71.59	69.3	52.63	52.9	55.1	51.75	-	77.13	86.5	68.36	59.17	59.26	57.84	71.01	71.87	56.12	56.12	56.48	56.33	67.08	61.81	61.4	61.4	57.86	56.86	56.12
OsSUS2	73.19	74.81	69.24	69.08	52.12	55.57	54.6	70.43	73.94	52.91	52.86	75.91	54.85	74.69	66.12	53.28	74.47	70.93	73.66	71.09	74.31	74.44	70.19	70.47	68.55	53.54	53.23	55.67	52.09	80.32	-	76.8	67.56	59.13	60.02	60.19	71.76	72.85	59	59	58.55	58.7	67.38	63.13	62.7	62.7	60.12	59.12	59
OsSUS3	72.28	73.89	67.91	67.58	50.68	52.52	53.15	69.75	73.95	53.13	51.17	76.02	53.28	74.69	65.12	52.88	74.35	69.75	72.17	69.49	72.95	73.33	67.53	69.91	67.54	52.76	51.89	54.25	51.1	89.95	79.58	-	66.21	58.97	59.3	58.45	71.01	71.91	56.71	56.71	56.9	56.96	67.29	62.77	62.34	62.34	58.47	57.27	56.71
OsSUS4	67.58	68.7	79.43	74.16	54.5	55.01	57.18	79.73	68.32	55.07	55.32	70.02	57.43	69.19	75	54.95	68.9	79.85	67.04	64.71	67.33	68.7	79.85	78.73	77.32	54.73	56.37	58.13	54.55	69.8	70.4	68.07	-	59.26	60.34	59.32	66.46	67.62	59.26	59.26	59.03	59.05	73.72	68.1	67.67	67.67	59.33	58.53	59.26
OsSUS5	54.77	54.4	57.77	55.03	64.66	63.45	69.34	57.43	53.57	67.23	66.38	55.04	69.34	53.96	54.99	67.51	54.6	57.68	53.84	51.45	54.02	54.77	57.68	63.81	56.4	66.13	69.12	69.2	69.3	54.49	54.33	53.87	56.77	-	77.12	65.14	58.03	59.2	66.48	66.99	66.55	65.62	59.55	56.61	56.32	56.32	65.08	65.16	66.48
OsSUS6	54.99	54.61	56.27	54.48	63.14	63.94	68.01	56.63	53.47	66.55	65.08	55.68	68.01	54.36	53.57	66.31	55.06	57.13	54.24	51.62	54.42	54.92	56.51	62.69	54.58	65.64	67.66	69.17	68.55	53.66	54.85	53.53	57.52	78.99	-	64.96	58.45	59.7	66.44	66.96	66.01	65.42	58.69	56.43	56.21	56.21	65.01	64.92	66.44
PbrSUS1	56.25	55.86	57.5	56.34	66.96	69.69	70.51	57.92	54.43	71.23	69.62	55.82	71.52	54.83	56.32	72.04	54.17	58.18	55.29	52.82	55.61	55.74	57.27	65.42	56.99	94.05	72.74	70.18	72.19	55.11	55.84	54.85	57.09	67.73	67.47	-	57.76	59.09	71.01	72.17	70.34	71.83	60.58	56.98	56.57	56.57	99.57	99.15	71.01
PbrSUS2	77.89	79.03	67.6	65.69	49.1	53.75	52.93	68.61	79.54	52.29	51.4	82.57	53.05	80.69	65.13	52.42	81.45	68.36	94.16	90.96	96.07	91.12	66.58	68.2	66.49	52.92	52.27	54.31	50.67	72.05	73.44	72.17	66.16	52.64	53.06	54.07	-	95.53	57.15	57.15	56.77	56.98	66.75	61.02	60.67	60.67	57.87	56.39	57.15
PbrSUS3	79.16	80.4	68.61	66.63	50.56	54.96	54.53	69.35	81.64	53.04	52.8	84.1	54.41	82.63	65.58	53.29	82.51	69.23	96.4	93.41	96.53	92.94	68.11	70.28	67.8	54.3	53.8	56.25	52.67	72.58	74.56	72.95	67.08	54.02	54.05	55.22	95.18	-	58.83	58.83	58.44	58.74	68.05	63.06	62.69	62.69	59.15	57.97	58.83
PbrSUS4	54.61	53.98	55.61	52.72	72.51	67.4	77.86	55.15	53.53	68.26	73.93	54.88	78.23	54.05	53.44	68.73	53.5	55.28	54.12	52.1	53.8	54.81	55.03	65.26	54.85	69.53	96.58	89.54	90.97	52.64	53.61	51.76	56.87	69.38	68.65	71.25	52.66	54.05	-	100	92.54	91.51	60.47	59.24	58.97	58.97	70.98	70.86	100
PbrSUS5	54.61	53.98	55.61	52.72	72.69	68.78	78.24	55.15	53.53	69.73	74.29	54.88	78.62	54.05	53.44	70.13	53.51	55.28	54.12	52.1	53.8	54.81	55.03	65.26	54.85	70.62	96.69	91.47	90.96	52.64	53.61	51.76	56.87	69.38	68.65	72.44	52.66	54.05	100	-	92.68	92.92	60.47	59.24	58.97	58.97	72.14	72.09	100
PbrSUS6	53.34	53.08	55.26	52.31	71.23	66.24	77.13	54.92	52.11	66.98	72.69	53.61	77.75	52.64	52.78	67.14	52	55.04	53.35	51.42	53.15	53.93	54.41	64.37	54.47	68.88	92.68	91.78	93.11	52.24	53.35	51.73	56.28	69.76	69.9	70.07	51.58	53.41	91.67	91.86	-	95.79	60.08	58.65	58.38	58.38	70.31	70.42	92.54
PbrSUS7	54.36	53.98	56.12	52.97	70.95	67.22	76.4	55.78	52.9	68.89	72.03	54.25	77.01	53.54	53.18	69.06	53.45	55.9	54.37	52.48	54.18	54.81	55.03	64.88	54.85	70.26	92.19	93.25	91.53	53.27	54.12	52.52	56.62	68.75	68.4	71.55	52.79	54.43	91.26	92.89	94.46	-	59.87	58.63	58.37	58.37	71.72	71.82	91.51
PbrSUS8	67.8	69.56	76.69	81.73	54.84	55.25	55.82	78.38	69.69	54.57	55.82	71.03	55.94	70.06	81.81	54.82	70.26	78.5	68.01	65.53	68.3	69.81	77	95.15	97.38	55.48	54.72	57.28	53.88	69.8	69.06	68.42	78.32	57.03	54.96	57.78	67.27	68.55	55.1	55.1	54.73	55.1	-	69.9	69.39	69.39	60.51	59.88	60.47
PbrSUS9	65.38	66.67	76.42	70.99	56.1	55.74	56.65	77.41	65.2	55.19	54.46	67.71	56.28	65.93	70.33	55.56	66.61	76.87	64.95	61.51	64.84	65.93	86.23	70.92	71.77	55.68	57.17	56.47	55.41	66.97	66.61	65.88	75.96	57.99	56.1	56.57	63.79	65.75	57.17	57.17	56.11	56.98	72.31	-	99.94	99.94	56.83	56.61	59.24
PbrSUS10	65.2	66.48	76.23	70.8	55.92	55.56	56.47	77.23	65.02	55.01	54.28	67.52	56.1	65.75	70.15	55.37	66.42	76.68	64.77	61.33	64.65	65.75	86.05	70.72	71.58	55.49	56.98	56.29	55.22	66.79	66.42	65.69	75.77	57.81	55.92	56.39	63.6	65.57	56.98	56.98	55.92	56.8	72.13	99.82	-	100	56.42	56.14	58.97
PbrSUS11	65.2	66.48	76.23	70.8	55.92	55.56	56.47	77.23	65.02	55.01	54.28	67.52	56.1	65.75	70.15	55.37	66.42	76.68	64.77	61.33	64.65	65.75	86.05	70.72	71.58	55.49	56.98	56.29	55.22	66.79	66.42	65.69	75.77	57.81	55.92	56.39	63.6	65.57	56.98	56.98	55.92	56.8	72.13	99.82	100	-	56.42	56.14	58.97
PbrSUS12	56.44	56.05	57.55	56.4	67	69.73	70.43	57.98	54.62	71.38	69.66	55.87	71.43	55.02	56.37	72.08	54.22	58.24	55.48	53.01	55.67	55.93	57.07	65.67	57.05	93.94	72.77	70.35	72.23	55.17	55.9	54.78	56.88	67.77	67.51	99.07	54.27	55.41	71.29	72.47	70.36	71.84	57.71	56.28	56.1	56.1	-	98.76	70.98
PbrSUS13	53.44	53.31	55.71	52.97	65.6	68.3	69.62	55.34	51.79	70.3	68.03	52.84	70.54	51.93	54.03	71.02	51.2	55.75	52.42	49.79	52.62	52.76	54.93	64.64	53.9	94	71.25	69.06	70.48	52.05	52.62	52.32	54.75	67.2	65.6	100	50.78	52.35	69.49	70.71	68.11	69.64	54.74	56.12	55.91	55.91	99.1	-	70.86
PbrSUS14	54.61	53.98	55.61	52.72	72.51	67.4	77.86	55.15	53.53	68.26	73.93	54.88	78.23	54.05	53.44	68.73	53.5	55.28	54.12	52.1	53.8	54.81	55.03	65.26	54.85	69.53	96.58	89.54	90.97	52.64	53.61	51.76	56.87	69.38	68.65	71.25	52.66	54.05	100	100	91.67	91.26	55.1	57.17	56.98	56.98	71.29	69.49	-
PbrSUS15	79.25	80.38	69	67.25	51.07	55.37	54.69	69.75	81.12	54.07	53.07	83.98	54.82	82.25	66.71	54.32	82.38	69.62	95.38	92.48	97.38	92.38	68.12	70.28	67.93	54.46	54.21	56.45	52.69	73.5	75	73.62	67.83	54.3	54.71	55.64	98.22	96.25	54.59	54.59	53.57	54.72	68.69	65.57	65.38	65.38	55.83	52.51	54.59
PbrSUS16	79.16	80.52	68.98	67	50.94	55.21	55.16	69.73	81.89	53.42	53.29	84.47	55.03	82.88	65.96	53.66	82.88	69.6	96.15	93.16	96.41	92.94	68.49	70.28	68.05	54.56	54.43	56.53	52.93	73.08	74.94	73.33	67.7	54.65	54.42	55.61	95.69	98.76	54.68	54.68	53.8	54.81	68.68	65.93	65.75	65.75	55.8	52.49	54.68
PbrSUS17	80.77	80.52	69.35	66.17	50.92	53.59	54.6	69.18	81.98	52.46	52.87	84.1	54.48	82.13	65.58	52.57	81.96	68.94	89.7	87.19	90.33	97.15	67.7	71.59	68.01	52.63	53.1	55.42	52.12	71.15	72.86	71.64	67.41	53.74	53.47	53.85	88.96	90.83	53.01	53.01	51.87	53.47	68.51	64.23	64.05	64.05	53.9	51	53.01
PgSUS1	81.89	84.49	68.61	68.62	52.32	54.96	55.28	70.1	82.88	54.78	54.04	86.58	55.4	84	67.08	54.66	85.24	69.73	82.98	79.83	83.62	83.75	69.11	72.15	69.43	54.94	54.68	56.68	53.32	75.56	74.81	74.94	68.82	54.97	54.86	56.79	82.59	83.87	55.06	55.06	54.57	55.06	69.94	66.48	66.3	66.3	56.98	54.14	55.06
PgSUS2	54.11	54.36	55.85	55.11	70.57	68.12	76.09	55.51	53.31	70.13	73.07	54.5	76.33	53.43	55.71	70.65	54.34	56.01	54.12	52.26	54.43	54.81	55.39	65.3	56.1	70.92	74.41	73	73.39	53.47	55.04	53.71	56.34	67.83	65.84	72.24	53.45	54.06	74.69	75.06	74.06	74.11	56.73	54.83	54.64	54.64	72.28	70.89	74.69
PgSUS3	67.2	69.32	82.8	76.18	54.43	56.79	57.35	83.46	69.69	56.24	55.62	71.52	57.35	70.06	75.53	55.75	70.76	83.7	68.41	65.96	69.07	69.69	83.46	79.25	77.72	55.42	55.16	57.08	53.44	69.68	70.9	68.19	81.31	56.45	56.7	57.55	68.32	69.07	55.67	55.67	54.8	55.79	78.47	77.55	77.37	77.37	57.74	54.67	55.67
PgSUS4	81.74	83.98	70.31	68.83	53.77	55.78	56.34	70.81	82.73	56.09	54.85	86.34	56.09	83.73	67.46	56.09	84.97	70.81	82.36	79.3	82.61	83.85	69.44	71.21	69.65	55.39	55.13	57.04	53.52	76.27	75.28	75.53	70.02	55.29	55.68	56.21	81.17	83.23	55.39	55.39	54.77	55.64	70.28	65.87	65.69	65.69	56.4	53.94	55.39
PgSUS5	55.94	55.2	58.22	56.88	66.06	68.36	71.6	58.13	54.69	68.38	68.76	56.02	72.08	55.58	56.61	69.23	54.49	57.88	55.65	53.3	56.33	57.07	56.53	67.72	57.13	71.95	71.64	70.72	70.16	55.28	55.07	54.55	58.84	66.59	67.07	72.33	54.89	55.96	69.94	70.92	68.39	70.01	57.5	57.56	57.38	57.38	72.36	71.45	69.94
PpSUS1	81.76	81.89	70.22	68.37	52.45	56.7	55.53	70.84	83.5	54.66	53.91	86.34	55.28	84.62	67.33	55.16	84.99	70.84	89.44	86.55	89.83	92.43	69.35	72.9	70.06	55.44	54.56	56.82	53.46	74.69	74.94	75.19	69.07	55.97	55.36	56.79	88.44	90.32	55.06	55.06	54.57	55.57	70.69	66.85	66.67	66.67	56.98	53.87	55.06
PpSUS2	67.92	69.31	77.07	82.1	54.59	55.87	56.82	79.12	69.31	54.19	56.2	71.03	56.7	69.56	82.43	54.19	70.39	79.25	67.13	64.9	67.42	69.43	78.25	91.6	92.75	55.61	55.23	57.28	54.01	70.3	68.93	68.3	78.45	56.27	54.45	58.05	66.37	67.8	55.48	55.48	55.12	55.36	93.25	73.04	72.86	72.86	57.84	55.15	55.48
PpSUS3	71.83	71.99	85.78	78.44	59.56	60	60.56	85.62	71.83	59.94	59	74.45	59.94	72.77	77.62	60.41	73.55	85.78	70.22	67.14	70.74	71.83	88.59	79.29	80.62	60.16	59.94	59.31	58.4	71.83	71.21	70.42	81.72	60.89	60.28	61.35	69.33	71.05	60.58	60.58	59.74	60.42	81.25	80.8	80.62	80.62	61.41	60.88	60.58
PpSUS4	67.02	68.74	74.6	80.98	54.79	56.94	57.01	77.15	68.61	55.42	56.48	70.03	57.01	68.74	80.26	55.56	69.71	77.68	66.31	63.96	67.02	68.21	75.56	89.18	87.58	56.2	56.01	56.52	55.01	68.78	68.92	66.67	76.35	56.43	55.17	58.15	66.03	67.02	56.28	56.28	55.63	55.87	88.11	70.44	70.26	70.26	58.21	55.36	56.28
PpSUS5	56.2	55.96	57.3	54.96	73.16	71.08	78.81	56.97	55.13	72.53	74.94	56.59	79.18	55.65	55.43	73.04	55.79	56.97	56.22	54.11	55.78	56.65	57.09	66.79	56.57	73.77	91.43	88.61	88.55	54.26	55.47	53.28	58.79	72.36	71.01	75.76	54.58	56.27	92.17	92.27	90.19	89.73	57.32	58.11	57.92	57.92	75.79	74.06	92.17
PpSUS6	54.89	54.89	57.6	54.89	66.75	69.16	71.45	57.14	53.72	70.63	68.77	55.53	72.04	53.97	54.86	71.51	53.86	57.27	54.29	52.05	54.71	54.47	56.65	65.3	55.25	85.81	73.31	70.01	72.12	53.87	54.83	53.51	56.24	69.3	67.48	86.44	53.37	54.34	70.49	72.12	70.2	72.01	56	56.65	56.47	56.47	86.22	85.89	70.49
VvSS1	54.22	54.34	55.82	54.59	70.85	70.01	78.15	55.49	53.52	71.57	74.43	55.47	78.63	53.91	54.56	72.51	55.17	55.49	54.35	52.24	54.41	54.91	55.98	63.99	54.57	72.17	78.12	75.41	76.74	54.39	54.35	53.03	55.57	70.06	68.13	72.7	53.31	54.41	78.85	79.04	77.34	76.97	55.19	55.19	55.01	55.01	72.61	71.39	78.85
VvSS2	67.29	68.78	77.32	82.53	53.93	55.94	55.51	80.94	69.03	54.4	54.15	70.49	55.64	69.65	81.05	54.4	69.57	80.69	67.37	65.29	67.79	69.4	78.47	86.75	85.73	55.43	54.29	57.51	52.93	69.85	69.99	67.62	79.9	55.71	55.65	57.44	66.5	68.03	54.55	54.55	54.17	54.92	86.11	74.82	74.64	74.64	57.24	54.68	54.55
VvSS3	69.23	69.48	82.32	79.06	54.49	56.72	57.53	83.35	70.84	57.41	55.8	72.8	57.65	71.59	77.93	57.41	71.41	83.72	70.19	67.75	70.6	71.46	82.24	82.84	81.12	56.6	55.72	57.43	54.27	70.21	70.43	68.73	81.46	57.5	56.51	58.78	69.12	70.72	55.6	55.6	54.99	55.85	81.5	76.68	76.5	76.5	58.83	56.79	55.6
VvSS4	80.02	80.77	71.34	69.53	52.24	54.36	54.21	72.24	82.1	54.55	53.47	84.22	54.21	82.51	68.84	53.81	83.19	72	79.63	76.71	79.4	81.14	69.14	73.46	71.11	53.94	53.58	56.42	52.6	75.22	75.22	75.34	70.72	54.75	54.4	55.37	78.65	79.78	53.69	53.7	52.93	54.47	71.73	66.54	66.36	66.36	55.43	53.35	53.69
VvSS5	55.02	54.15	55.45	53.85	66.95	68.43	73.33	54.99	53.52	69.37	70.14	55.72	73.81	54.41	54.31	70.26	54.08	55.36	55.1	52.99	55.4	55.65	54.38	64.37	54.94	72.79	74.85	72.81	73.45	53.87	54.15	53.14	54.95	70.86	69.69	72.84	54.07	55.28	72.93	74.25	72.1	72.84	55.44	56.28	56.1	56.1	73.1	72.23	72.93
																			Coding region nucleotide (upper portion of matrix, green) and amino acid (bottom portion of matrix, orange) sequence pairwise comparisons (% similarity) between five pomegranate sucrose synthase genes calculated using Clustal Omega program (https://www.ebi.ac.uk/Tools/msa/clustalo/).
[truncated: 19 more columns]
