# Supplementary material for: Identification and expression analysis of the sucrose synthase gene family in pomegranate (Punica granatum L.)
Source: PeerJ. 2022 Jan 10;10:e12814. doi: 10.7717/peerj.12814 (PMC8757371; doi:10.7717/peerj.12814)
Supplement: Supplemental Information 6 [file peerj-10-12814-s006.xls]

## Sheet:  Intron exon structural
Data S6. Intron/exon structural organization of 68 SUS genes
	Gene Name	Gene ID	mRNA	five_prime_UTR	Exon num	exon	exon1	exon2	exon3	exon4	exon5		exon6		exon7	exon8	exon9	exon10	exon11	exon12	exon13		exon14	exon15	exon	exon	exon	exon	exon	exon	exon	exon	three_prime_UTR
SUS I	PbrSUS3	Pbr003395	3434		15		98	127	152	193	432	1	1	1	1	177	117	167	225	564	1	1	172	1
	PbrSUS16	Pbr035997	3435		15		98	127	152	193	432	1	1	1	1	177	117	167	225	564	1	1	172	1
	MdSUS1.1	MDP0000160578	3436		15		98	127	152	193	432	1	1	1	1	177	117	167	225	564	1	1	169	1
	MdSUS1.2	MDP0000215889	3436		15		98	127	152	193	431	1	1	1	1	169	117	167	225	564	1	1	172	1
	MdSUS1.3	MDP0000872262	3457		15		98	127	152	193	432	1	1	1	1	177	117	167	225	564	1	1	172	1
	PbrSUS2	Pbr003394	3512		15		98	109	152	193	432	1	1	1	1	177	117	167	225	272	259		172	1
	PbrSUS15	Pbr035996	3459		15		98	109	152	193	432	1	1	1	1	177	117	167	225	564	1	1	172	1
	PbrSUS17	Pbr037395	4687	877	15		98	127	152	193	432	1	1	1	1	177	117	167	225	564	1	1	262	1									222
	MdSUS1.4	MDP0000250070	3662		15		98	127	152	193	432	1	1	1	1	177	117	167	225	564	1	1	172	1
	PpSUS1	PAC:17645028	4119	247	14		98	127	152	193	336	1	1		96	174	117	167	225	564	1	1	139	33
	PgSUS1	XM_031527544	6569		16	175	100	127	152	193	336	1	1		96	174	117	167	225	564	1	1	139		325
	PgSUS4	XM_031516902	6647		16	150	125	127	152	193	336	1	1		270	2	117	167	225	564	1	1	139		307
	AtSUS1	AT5G20830	5172	235	16	236	150	127	152	193	336	1	1		96	174	117	167	225	564	1	1	139		406								372
	AtSUS2	AT5G49190	4407	398	14	488		133	152	193	119		217		96	174	117	167	225	322	245	1	139										223
	GmSUS3	Glyma.09G073600	6940	77	15		98	127	152	193	336	1	1		96	174	117	167	225	564	1	1	139	33									1091
	GmSUS8	Glyma.15G182600	9033	105	15		98	127	152	193	336	1	1		96	174	117	167	225	564	1	1	139	33									848
	GmSUS6	Glyma.13G114000	6729	75	14		98	127	152	193	432	1	1	1	1	174	117	167	225	564	1	1	139
	GmSUS11	Glyma.17G045800	7371	75	15		98	127	152	193	432	1	1	1	1	174	117	167	225	564	1	1	139	30									2249
	VvSS4	VIT_211s0016g00470	3680		15		98	127	152	193	336	1	1		96	174	117	167	225	564	1	1	162	37
	OsSUS2	LOC_Os06g09450	6292	153	16	139	111	121	152	193	119		217		96	174	117	167	225	319	245	1	139		657								608
	OsSUS1	LOC_Os03g28330	6355	128	15	100	140	130	152	193	119		217		96	174	117	167	225	319	245	1			613								425
	OsSUS3	LOC_Os07g42490	5543	89	16	64	137	130	152	193	119		217		96	174	117	167	225	319	245	1	139		326								277
SUS II	PbrSUS8	Pbr014902	4601		15		65	133	152	193	119		217		96	174	117	167	225	322	244		139	39
	MdSUS2.3	MDP0000293214	4624		15		65	133	152	193	119		217		96	174	117	167	225	322	244		139	39
	MdSUS2.2	MDP0000581406	2666		8								207		96	174	117	167	225	322	302
	PpSUS2	PAC:17659255	5361		15		65	133	152	193	119		217		96	174	117	167	225	322	244		139	39									245
	PpSUS4	PAC:17662339	4232		14		72		152	193	119		217		96	174	117	167	225	322	244		175	1
	VvSS2	VIT_205s0077g01930	7552		14		92	133	152	193	119		217		96	174	117	167	225	648			139	36
	GmSUS9	Glyma.15G151000	10924	71	15		20	133	152	193	119		217		96	174	117	167	225	322	245	1	139	30									294
	AtSUS4	AT3G43190	5095	240	15	241	132	279		193	336	1	1		96	174	117	167	225	564	1	1	139		227								193
	OsSUS4	LOC_Os03g22120	6195	52	16	53	151	127	152	193	119		217		96	174	117	167	225	322	245	1	139		325								285
	VvSS3	VIT_207s0005g00750	8232		15		98	133	152	193	119		217		96	174	117	167	225	322	245	1	139	39
	GmSUS2	Glyma.03G216300	6240	133	15	101		133	152	193	119		217		96	174	117	167	225	322	245	1	139	39									495
	GmSUS12	Glyma.19G212800	6133	118	15		100	133	152	193	119		217		96	174	117	167	225	322	245	1	139	39									541
	PgSUS3	XM_031544401	7425		17	244	140	133	152	193	119		217		96	174	117	167	225	322	193	49	139		332
	AtSUS3	AT4G02280	4265	439	15		538	133	345	1	336	1	1		96	291	1	167	225	322	245	1	139		305								271
	PpSUS3	PAC:17663747	4354	237	12		69				119		217		96	174	117	167	225	322	245	1	139	33									241
	MdSUS2.1	MDP0000126946	5335		16		101	133	152	193	119		217	87	96	174	117	167	225	322	245	1	139	39
	PbrSUS9	Pbr022715.1	3152		10								246		96	175	107	86	225	322	245	1	139	39
	PbrSUS10	Pbr026336.1	3099		10								246		96	175	107	107	225	322	245	1	139	39
	PbrSUS11	Pbr026342.1	3099		10								246		96	175	107	107	225	322	245	1	139	39
SUS III	OsSUS5	LOC_Os04g24430	5195	74	18	75	176	133	155	193	119		217		96	177	117	167	225	322	245	1	139	92	24	247							200
	OsSUS6	LOC_Os02g58480	6835	189	14	418			155	309	1	313				177	117	167	225	322	245	1	139	197	766								817
	PbrSUS1	Pbr001616.1	3994		14		104		165	202	119	313				174	117	167	225	567	1	1	139	146	133
	PbrSUS13	Pbr031564.1	4110		14		104	267	1	202	119	313				174	117	167		567	1	1	139	146	133
	PbrSUS12	Pbr028302.1	4030		14		104		165	202	119	313				174	117	167	258	567	1	1	139	146	133
	MdSUS3.1	MDP0000212593	4068		15		104	285	1	202	119	313				129	117	167	225	567	1	1	139	152	133
	PpSUS6	PAC:17655913	4253		15		101	133	155	199	119	313				174	117	167	225	567	1	1	139	131	157
	GmSUS4	Glyma.09G167000	5885	232	16		110	133	155	193	119		217		96	174	117	167	225	567	1	1	139	197	157								171
	GmSUS10	Glyma.16G217200	5457	61	16		110	133	155	193	119		217		96	174	117	167	225	567	1	1	139	197	154								158
	VvSS5	VIT_217s0053g00700	4418		17		104	133	155	193	119		217		96	174	117	167	225	567	1	1	139	158	24	133
	PgSUS5	XM_031551757	4768		16	344		133	155	196	119		217		96	174	117	167	225	567	1	1	139	152	378
	AtSUS5	AT5G37180	4998	96	14	316			155	184	119	313				174	117	167	225	567	1	1	139	86	275								225
	AtSUS6	AT1G73370	4614	403	14	23	511	133	155	193	119		217		270	1	284	1	225	567	1	1	139	589									168
	PgSUS2	XM_031535599	4248		15		281		155	193	336	1	1		96	174	117	167	225	567	1	1	139	68	24	168
	GmSUS1	Glyma.02G240400	5546	120	17		234	1	155	193	119		217		96	174	117	167	225	567	1	1	139	80	24	16							346
	GmSUS7	Glyma.14G209900	5751	59	17		234	1	155	193	119		217		96	174	117	167	225	567	1	1	139	80	24	16							352
	GmSUS5	Glyma.11G212700	5194	227	17		237	1	155	193	119		217		96	174	117	167	225	567	1	1	139	89	27	16							218
	VvSS1	VIT_204s0079g0023	3965		16		234	1	155	193	119		217		96	174	117	167	225	567	1	1	139	80	40
	PpSUS5	PAC:17663015	3754		15		234	1	155	193	119		217		96	174	117	167	225	567	1	1	139	99
	PbrSUS5	Pbr008464	10217		21		234	1	155	193	119		217		96	129	117	167	225	567	1	1	139	87			75	117	71	298	290	64
	PbrSUS14	Pbr033571	10605		22		234	1	155	193	119		217		96	129	117	167	225	567	1	1	139	97		59	75	117	71	298	290	64
	PbrSUS4	Pbr008457	11793		22		234	1	155	193	119		217		96	129	117	167	225	567	1	1	139	97		59	75	117	71	298	290	64
	MdSUS3.2	MDP0000138004	3904		15		234	1	155	193	119		217		96	129	117	167	225	567	1	1	139	102
	MdSUS3.3	MDP0000204870	3731		15			18	155	193	68		217		96	129	117	167	225	567	1	1	139	87	90
	PbrSUS7	Pbr012642	4066		16		234	1	155	193	119		217		96	129	117	167	225	567	1	1	139	87	90
	PbrSUS6	Pbr012641	12886		23		234	1	155	193	119		217		96	90	117	167	225	567	1	1	139	87	37	59	75	117	71	298	290	64
	MdSUS3.4	MDP0000204871	3864		15		234	1	155	193	68		217		96	111	117	167	225	567	1	1	139	87
