# Supplementary material for: Identification and expression analysis of the sucrose synthase gene family in pomegranate (Punica granatum L.)
Source: PeerJ. 2022 Jan 10;10:e12814. doi: 10.7717/peerj.12814 (PMC8757371; doi:10.7717/peerj.12814)
Supplement: Supplemental Information 8 [file peerj-10-12814-s008.xls]

## Sheet: Conserved Motif of SUS genes
Data S8. Conserved motifs of SUS proteins in pomegranate with other species
MotifID	Length/aa	Motif Seq	Motif Feature
MEME-1	79	IIGNYSDGNLVASLMAHKLGVTQCTIAHALEKTKYPDSDIYWKKLDPKYHFSCQFTADLIAMNHTDFIITSTYQEIAGS	Sucrose synthase
MEME-2	57	TVIEAMTCGLPTFATCQGGPAEIIVDGVSGFHIDPYHGDZAANKJADFFEKCKTDPS	Glycosyl transferases group 1
MEME-3	70	VVYILDQVRALEEEMLLRIKQQGLDVTPRILIVTRLJPDAKGTTCNQRLEKVSGTEHSHILRVPFRTEKG	Sucrose synthase
MEME-4	61	SKDREEIAEIKKMHELIEKYKLNGQFRWIAAQTBRVRNGELYRYIADTKGAFVQPALYEAF	Unknown
MEME-5	57	DTVGQYESHTAFTLPGLYRVVHGIBVFDPKFNIVSPGADMSVYFPYSEKZKRLTSFH	Sucrose synthase
MEME-6	80	PYSEFELRFQEWGFERGWGDTAERVLEMMHLLLEVLZAPDPSTLEKFLGRJPMVFNVVILSPHGYFGQABVLGLPDTGGQ	Sucrose synthase
MEME-7	57	EENDEHIGVLKDRKKPIIFSMARLDRVKNJTGLVEWYGKNKRLRELVNLVVVGGFFD	Glycosyl transferases group 1
MEME-8	57	WBKISQAGLQRIYEKYTWKIYSERLLTLGGVYGFWKQVSKLERRETRRYJEMFYNLK	Unknown
MEME-9	57	TQEAIVLPPFVAFAVRPRPGVWEYVRVNVHDLSVEEJTVAEYLKFKEELVDGSWNGB	Sucrose synthase
MEME-10	41	FVLELDFEPFBASFPRPTLSSSIGNGVQFLNRHLSSKLFHD	Sucrose synthase
MEME-11	41	QPLLDFLRVHNYKGENLMLNDRJQTVSKLQSALRKAEEYLS	Sucrose synthase
MEME-12	48	LTRSDSJRERMPDTLSQSRNEMKALLSRYVAKGKGILQPHQLMAEFEA	Sucrose synthase
MEME-13	29	RKWISRFDVWPYLETFAEDAAAEIAKELQ	Sucrose synthase
MEME-14	200	VILIFVAIGIVFLPIGFASLFASEHVVEIVNHYDRDCVPPNYMDNKLAYIQSSKTNKTCIRRVTIPKQMKSPVYIYYQLDHFYQNHRRYVKSRSDGQLRSKSNEKKTDTCAPERYTANGAIVPCGLVAWSLFNDTYKFSVNNKQLGVSKKDITWKSDPKKKFGSDVYPKNFQSGGLIGGAKLNSSIPLSEQEDLMVWMRT	CDC50
MEME-15	11	FRNLAKSVPLA	Unknown
