# Supplementary material for: Identification and expression analysis of the sucrose synthase gene family in pomegranate (Punica granatum L.)
Source: PeerJ. 2022 Jan 10;10:e12814. doi: 10.7717/peerj.12814 (PMC8757371; doi:10.7717/peerj.12814)
Supplement: Supplemental Information 11 [file peerj-10-12814-s011.xls]

## Sheet: Cis-element of five PgSUS genes
Data S11 Cis-acting elements in promoter of PgSUSs gene family
Gene name	Cis-element	Sequences	Position	length	Function		LRE
PgSUS1	CGTCA-motif	CGTCA	483	5	cis-acting regulatory element involved in the MeJA-responsiveness		HRE
PgSUS1	motif I	gGTACGTGGCG	389	10	cis-acting regulatory element root specific		SRE
PgSUS1	GATA-motif	GATAGGG	1258	7	part of a light responsive element		TSE
PgSUS1	TGACG-motif	TGACG	483	5	cis-acting regulatory element involved in the MeJA-responsiveness		ORE
PgSUS1	CAT-box	GCCACT	124	6	cis-acting regulatory element related to meristem expression
PgSUS1	ABRE	ACGTG	825	5	cis-acting element involved in the abscisic acid responsiveness
PgSUS1	ABRE	ACGTG	1341	5	cis-acting element involved in the abscisic acid responsiveness
PgSUS1	ABRE	ACGTG	1768	5	cis-acting element involved in the abscisic acid responsiveness
PgSUS1	GT1-motif	GGTTAA	1639	6	light responsive element
PgSUS1	Box 4	ATTAAT	763	6	part of a conserved DNA module involved in light responsiveness
PgSUS1	Box 4	ATTAAT	1413	6	part of a conserved DNA module involved in light responsiveness
PgSUS1	Box 4	ATTAAT	1912	6	part of a conserved DNA module involved in light responsiveness
PgSUS1	Box 4	ATTAAT	1974	6	part of a conserved DNA module involved in light responsiveness
PgSUS1	Box 4	ATTAAT	1982	6	part of a conserved DNA module involved in light responsiveness
PgSUS1	TC-rich repeats	GTTTTCTTAC	1645	9	cis-acting element involved in defense and stress responsiveness
PgSUS1	G-box	CACGTC	824	6	cis-acting regulatory element involved in light responsiveness
PgSUS1	G-box	CAGACGTGGCA	1338	10	cis-acting regulatory element involved in light responsiveness
PgSUS1	G-box	TACGTG	1767	6	cis-acting regulatory element involved in light responsiveness
PgSUS1	AE-box	AGAAACTT	682	8	part of a module for light response
PgSUS1	GC-motif	CCCCCG	441	6	enhancer-like element involved in anoxic specific inducibility
PgSUS1	LTR	CCGAAA	1800	6	cis-acting element involved in low-temperature responsiveness
PgSUS1	G-Box	CACGTT	1341	6	cis-acting regulatory element involved in light responsiveness
PgSUS1	circadian	CAAAGATATC	799	9	cis-acting regulatory element involved in circadian control
PgSUS2	LTR	CCGAAA	144	6	cis-acting element involved in low-temperature responsiveness
PgSUS2	LTR	CCGAAA	595	6	cis-acting element involved in low-temperature responsiveness
PgSUS2	MBS	CAACTG	1326	6	MYB binding site involved in drought-inducibility
PgSUS2	G-box	CACGAC	515	6	cis-acting regulatory element involved in light responsiveness
PgSUS2	CCAAT-box	CAACGG	668	6	MYBHv1 binding site
PgSUS2	ARE	AAACCA	1429	6	cis-acting regulatory element essential for the anaerobic induction
PgSUS2	A-box	CCGTCC	1778	6	cis-acting regulatory element
PgSUS2	RY-element	CATGCATG	696	8	cis-acting regulatory element involved in seed-specific regulation
PgSUS2	RY-element	CATGCATG	933	8	cis-acting regulatory element involved in seed-specific regulation
PgSUS2	GCN4_motif	TGAGTCA	10	7	cis-regulatory element involved in endosperm expression
PgSUS2	GT1-motif	GGTTAA	149	6	light responsive element
PgSUS2	Box 4	ATTAAT	357	6	part of a conserved DNA module involved in light responsiveness
PgSUS2	Box 4	ATTAAT	363	6	part of a conserved DNA module involved in light responsiveness
PgSUS2	MRE	AACCTAA	1149	7	MYB binding site involved in light responsiveness
PgSUS3	CGTCA-motif	CGTCA	907	5	cis-acting regulatory element involved in the MeJA-responsiveness
PgSUS3	CGTCA-motif	CGTCA	922	5	cis-acting regulatory element involved in the MeJA-responsiveness
PgSUS3	CGTCA-motif	CGTCA	1122	5	cis-acting regulatory element involved in the MeJA-responsiveness
PgSUS3	CGTCA-motif	CGTCA	1310	5	cis-acting regulatory element involved in the MeJA-responsiveness
PgSUS3	I-box	gGATAAGGTG	1112	9	part of a light responsive element
PgSUS3	I-box	AGATAAGG	1114	8	part of a light responsive element
PgSUS3	Box 4	ATTAAT	416	6	part of a conserved DNA module involved in light responsiveness
PgSUS3	Box 4	ATTAAT	713	6	part of a conserved DNA module involved in light responsiveness
PgSUS3	Box 4	ATTAAT	755	6	part of a conserved DNA module involved in light responsiveness
PgSUS3	Box 4	ATTAAT	790	6	part of a conserved DNA module involved in light responsiveness
PgSUS3	Box 4	ATTAAT	1297	6	part of a conserved DNA module involved in light responsiveness
PgSUS3	ABRE	ACGTG	1588	5	cis-acting element involved in the abscisic acid responsiveness
PgSUS3	CAT-box	GCCACT	1144	6	cis-acting regulatory element related to meristem expression
PgSUS3	CAT-box	GCCACT	1820	6	cis-acting regulatory element related to meristem expression
PgSUS3	GARE-motif	TCTGTTG	327	7	gibberellin-responsive element
PgSUS3	3-AF1 binding site	TAAGAGAGGAA	1628	10	light responsive element
PgSUS3	GATA-motif	AAGATAAGATT	1484	10	part of a light responsive element
PgSUS3	TGACG-motif	TGACG	907	5	cis-acting regulatory element involved in the MeJA-responsiveness
PgSUS3	TGACG-motif	TGACG	922	5	cis-acting regulatory element involved in the MeJA-responsiveness
PgSUS3	TGACG-motif	TGACG	1122	5	cis-acting regulatory element involved in the MeJA-responsiveness
PgSUS3	TGACG-motif	TGACG	1310	5	cis-acting regulatory element involved in the MeJA-responsiveness
PgSUS3	ACA-motif	AATCACAACCATA	487	12	part of gapA in (gapA-CMA1) involved with light responsiveness
PgSUS3	chs-CMA2a	TCACTTGA	542	8	part of a light responsive element
PgSUS3	LTR	CCGAAA	1430	6	cis-acting element involved in low-temperature responsiveness
PgSUS3	GC-motif	CCCCCG	1745	6	enhancer-like element involved in anoxic specific inducibility
PgSUS3	TCT-motif	TCTTAC	343	6	part of a light responsive element
PgSUS3	TCT-motif	TCTTAC	1627	6	part of a light responsive element
PgSUS3	TCT-motif	TCTTAC	1647	6	part of a light responsive element
PgSUS3	AE-box	AGAAACAA	279	8	part of a module for light response
PgSUS3	AE-box	AGAAACTT	407	8	part of a module for light response
PgSUS3	G-box	TACGTG	1587	6	cis-acting regulatory element involved in light responsiveness
PgSUS3	G-box	CACGAC	1883	6	cis-acting regulatory element involved in light responsiveness
PgSUS3	circadian	CAAAGATATC	648	9	cis-acting regulatory element involved in circadian control
PgSUS3	ATCT-motif	AATCTAATCC	637	9	part of a conserved DNA module involved in light responsiveness
PgSUS3	ATCT-motif	AATCTAATCC	1417	9	part of a conserved DNA module involved in light responsiveness
PgSUS3	Sp1	GGGCGG	1742	6	light responsive element
PgSUS3	AT1-motif	AATTATTTTTTATT	1341	14	part of a light responsive module
PgSUS4	CGTCA-motif	CGTCA	176	5	cis-acting regulatory element involved in the MeJA-responsiveness
PgSUS4	CGTCA-motif	CGTCA	739	5	cis-acting regulatory element involved in the MeJA-responsiveness
PgSUS4	Box 4	ATTAAT	49	6	part of a conserved DNA module involved in light responsiveness
PgSUS4	Box 4	ATTAAT	345	6	part of a conserved DNA module involved in light responsiveness
PgSUS4	ABRE	ACGTG	178	5	cis-acting element involved in the abscisic acid responsiveness
PgSUS4	ABRE	ACGTG	737	5	cis-acting element involved in the abscisic acid responsiveness
PgSUS4	ABRE	ACGTG	811	5	cis-acting element involved in the abscisic acid responsiveness
PgSUS4	GCN4_motif	TGAGTCA	1618	7	cis-regulatory element involved in endosperm expression
PgSUS4	MRE	AACCTAA	292	7	MYB binding site involved in light responsiveness
PgSUS4	GARE-motif	TCTGTTG	1440	7	gibberellin-responsive element
PgSUS4	GARE-motif	TCTGTTG	1874	7	gibberellin-responsive element
PgSUS4	O2-site	GATGACATGG	1931	9	cis-acting regulatory element involved in zein metabolism regulation
PgSUS4	TGACG-motif	TGACG	176	5	cis-acting regulatory element involved in the MeJA-responsiveness
PgSUS4	TGACG-motif	TGACG	739	5	cis-acting regulatory element involved in the MeJA-responsiveness
PgSUS4	3-AF1 binding site	TAAGAGAGGAA	1219	10	light responsive element
PgSUS4	GC-motif	CCCCCG	1112	6	enhancer-like element involved in anoxic specific inducibility
PgSUS4	LTR	CCGAAA	201	6	cis-acting element involved in low-temperature responsiveness
PgSUS4	LTR	CCGAAA	1077	6	cis-acting element involved in low-temperature responsiveness
PgSUS4	LTR	CCGAAA	1926	6	cis-acting element involved in low-temperature responsiveness
PgSUS4	ACE	GACACGTATG	809	9	cis-acting element involved in light responsiveness
PgSUS4	TGA-element	AACGAC	1072	6	auxin-responsive element
PgSUS4	G-box	CACGTC	177	6	cis-acting regulatory element involved in light responsiveness
PgSUS4	G-box	CACGTC	737	6	cis-acting regulatory element involved in light responsiveness
PgSUS4	G-box	TACGTG	811	6	cis-acting regulatory element involved in light responsiveness
PgSUS4	G-box	CACGAC	950	6	cis-acting regulatory element involved in light responsiveness
PgSUS4	ARE	AAACCA	452	6	cis-acting regulatory element essential for the anaerobic induction
PgSUS4	ARE	AAACCA	567	6	cis-acting regulatory element essential for the anaerobic induction
PgSUS4	ARE	AAACCA	1344	6	cis-acting regulatory element essential for the anaerobic induction
PgSUS4	ARE	AAACCA	1506	6	cis-acting regulatory element essential for the anaerobic induction
PgSUS4	TCCC-motif	TCTCCCT	1197	7	part of a light responsive element
PgSUS4	TCCC-motif	TCTCCCT	1559	7	part of a light responsive element
PgSUS5	MRE	AACCTAA	1412	7	MYB binding site involved in light responsiveness
PgSUS5	TGACG-motif	TGACG	665	5	cis-acting regulatory element involved in the MeJA-responsiveness
PgSUS5	GATA-motif	GATAGGG	658	7	part of a light responsive element
PgSUS5	MBSI	aaaAaaC(G/C)GTTA	1038	10.5	MYB binding site involved in flavonoid biosynthetic genes regulation
PgSUS5	Box 4	ATTAAT	1223	6	part of a conserved DNA module involved in light responsiveness
PgSUS5	GT1-motif	GGTTAA	1288	6	light responsive element
PgSUS5	GT1-motif	GGTTAAT	1415	7	light responsive element
PgSUS5	GT1-motif	GGTTAA	1434	6	light responsive element
PgSUS5	GT1-motif	GGTTAA	1556	6	light responsive element
PgSUS5	GT1-motif	GGTTAA	1786	6	light responsive element
PgSUS5	MSA-like	(T/C)C(T/C)AACGG(T/C)(T/C)A	1467	9	cis-acting element involved in cell cycle regulation
PgSUS5	MSA-like	TCCAACGGT	1469	9	cis-acting element involved in cell cycle regulation
PgSUS5	ABRE	TACGGTC	1135	7	cis-acting element involved in the abscisic acid responsiveness
PgSUS5	4cl-CMA1b	ATTCCGATAAACT	1153	12	light responsive element
PgSUS5	CGTCA-motif	CGTCA	665	5	cis-acting regulatory element involved in the MeJA-responsiveness
PgSUS5	TCA-element	TCAGAAGAGG	551	9	cis-acting element involved in salicylic acid responsiveness
PgSUS5	P-box	CCTTTTG	1534	7	gibberellin-responsive element
PgSUS5	CCAAT-box	CAACGG	1470	6	MYBHv1 binding site
PgSUS5	TCT-motif	TCTTAC	1203	6	part of a light responsive element
PgSUS5	TCT-motif	TCTTAC	1384	6	part of a light responsive element
PgSUS5	TC-rich repeats	GTTTTCTTAC	157	9	cis-acting element involved in defense and stress responsiveness
PgSUS5	LTR	CCGAAA	960	6	cis-acting element involved in low-temperature responsiveness
PgSUS5	ACE	CTAACGTATT	219	9	cis-acting element involved in light responsiveness
