# Supplementary material for: Identification and expression analysis of the sucrose synthase gene family in pomegranate (Punica granatum L.)
Source: PeerJ. 2022 Jan 10;10:e12814. doi: 10.7717/peerj.12814 (PMC8757371; doi:10.7717/peerj.12814)
Supplement: Supplemental Information 12 [file peerj-10-12814-s012.xlsx]

## Sheet: Sheet1
Data S12. Detail statistics of sequencing data
Sample	Raw Reads	Clean Read	Clean Base (G)	Mapped Reads	Mapping Rate	Q30 (%)	GC Content
OuterSeedCoat140	45916221	44922573	6.74	44459418	0.98969	92.47	0.502
OuterSeedCoat95	45832074	44178493	6.63	43700760	0.989186	96.91	0.503
OuterSeedCoat50	47512826	46628287	6.99	46049442	0.987586	96.58	0.504
InnerSeedCoat140	40307308	39402856	5.91	38983561	0.989359	92.68	0.495
InnerSeedCoat95	34778030	34203059	5.13	33821408	0.988842	95.26	0.502
InnerSeedCoat50	37643439	36887686	5.53	36467545	0.98861	94.12	0.528
pericarp140	44548129	43693264	6.56	43219624	0.98916	94.27	0.501
pericarp95	45528904	44814813	6.72	44320874	0.988978	94.3	0.5
pericarp50	46042665	45087524	6.76	44601817	0.989227	94.99	0.502
flower	44225952	43097154	6.46	42486550	0.985832	94.06	0.5
root	41819333	40839274	6.12	39564725	0.968791	92.95	0.501
leaf	43793434	42866514	6.43	42312525	0.987076	94	0.498
D-50-1	60622582	57496942	8.62	55700377	0.968754	94.93	0.507
D-50-2	56092872	53845372	8.08	52730132	0.979288	93.19	0.52
D-50-3	59301014	56930022	8.54	55378328	0.972744	95.08	0.516
D-I-95-1	58467202	56276028	8.44	54900922	0.975565	95.41	0.513
D-I-95-2	51452071	48919044	7.34	48073472	0.982715	93.43	0.512
D-I-95-3	57500346	54990458	8.25	53826789	0.978839	95.83	0.508
D-I-140-1	62286093	58914132	8.84	57775763	0.980677	93.82	0.51
D-I-140-2	61081357	58387596	8.76	56256403	0.963499	93.64	0.51
D-I-140-3	55900063	53661745	8.05	51798430	0.965277	95.2	0.511
D-O-95-1	50190246	48247455	7.24	46501285	0.963808	97	0.514
D-O-95-2	56526803	54414654	8.16	53003291	0.974063	92.92	0.512
D-O-95-3	44613794	42783250	6.42	42041182	0.982655	93.55	0.513
D-O-140-1	52577408	50270754	7.54	49369757	0.982077	95.35	0.515
D-O-140-2	43944667	42151875	6.32	40940876	0.971271	93.31	0.516
D-O-140-3	53560053	50249921	7.54	49014372	0.975412	94.51	0.519
T-50-1	46384404	44233468	6.64	43019514	0.972556	94.9	0.505
T-50-2	47850895	45032205	6.75	44263273	0.982925	93.61	0.506
T-50-3	33993842	32345403	4.85	31575695	0.976203	96.49	0.503
T-I-95-1	60033619	57234354	8.58	56162228	0.981268	96.67	0.515
T-I-95-2	45998524	43584951	6.54	42496887	0.975036	95.86	0.51
T-I-95-3	58094422	55030634	8.26	53100139	0.96492	95.05	0.508
T-I-140-1	57290676	54329923	8.14	52330683	0.963202	94.48	0.505
T-I-140-2	44464994	42520309	6.38	41709348	0.980928	93.91	0.51
T-I-140-3	43463362	41462482	6.22	40134082	0.967961	92.38	0.503
T-O-95-1	53517045	51175528	7.68	49549564	0.968228	92.89	0.512
T-O-95-2	56142762	53474311	8.02	51600429	0.964957	95.74	0.513
T-O-95-3	48070577	46321586	6.95	44595298	0.962733	97.12	0.511
T-O-140-1	50046688	47857065	7.18	46259549	0.966619	92.5	0.514
T-O-140-2	51588840	49720743	7.46	48501215	0.975472	94.03	0.515
T-O-140-3	49507398	47452654	7.11	45947874	0.968289	93.28	0.518
